# Supplementary material for: The importance of different spatial scales in determining structural and functional characteristics of deep-sea infauna communities
Source: Copernicus journal article supplement (doi:10.5194/bg-10-4547-2013), 2013-07-05
Supplement: Supplementary file 1 [file bg-10-4547-2013-supplement.zip]

## Supplement, Appendix B

**Table B1.** 4-factor PERMANOVA pairwise test results for significant double and three-way interactions based on the community structure data. Ar: area; WD: water depth; SD: sediment depth; perms: possible; permutations; P(MC): Monte-Carlo p-values. Bold P(MC) values:  $p < 0.05$ ; bold, italic values:  $p < 0.01$ . Gol: Gollum channels; Whi: Whittard Cayon; Cas: Cascais Canyon; Set: Setúbal Canyon; Naz: Nazaré Canyon

| Irish Margin        |             |       |       |              | Western Iberian Margin |             |       |       |              | Irish Margin           |             |       |       |              | Western Iberian Margin |             |       |       |              |
|---------------------|-------------|-------|-------|--------------|------------------------|-------------|-------|-------|--------------|------------------------|-------------|-------|-------|--------------|------------------------|-------------|-------|-------|--------------|
| Double interactions |             |       |       |              | Double interactions    |             |       |       |              | Three-way interactions |             |       |       |              | Three-way interactions |             |       |       |              |
| Within WD           | Comparisons | t     | perms | P(MC)        | Within WD              | Comparisons | t     | perms | P(MC)        | Within WD x SD         | Comparisons | t     | perms | P(MC)        | Within WD x SD         | Comparisons | t     | perms | P(MC)        |
| 1000                | Gol, Whi    | 2.374 | 10    | <b>0.001</b> | 3400                   | Cas, Naz    | 2.696 | 689   | <b>0.001</b> | 1000, 0-1              | Gol, Whi    | 1.708 | 10    | <b>0.066</b> | 3400, 0-1              | Cas, Naz    | 2.086 | 84    | <b>0.012</b> |
| 1000                | 0-1, 1-2    | 1.686 | 970   | 0.071        | 3400                   | Cas, Set    | 2.356 | 10    | <b>0.001</b> | 1000, 1-2              | Gol, Whi    | 1.961 | 10    | <b>0.038</b> | 3400, 0-1              | Cas, Set    | 1.161 | 10    | 0.298        |
| 1000                | 0-1, 2-3    | 1.902 | 984   | <b>0.042</b> | 3400                   | Cas, Slope  | 2.224 | 20    | <b>0.007</b> | 1000, 2-3              | Gol, Whi    | 2.043 | 10    | <b>0.037</b> | 3400, 0-1              | Cas, Slope  | 1.803 | 10    | 0.050        |
| 1000                | 0-1, 3-4    | 2.308 | 976   | <b>0.025</b> | 3400                   | Naz, Set    | 2.270 | 682   | <b>0.001</b> | 1000, 3-4              | Gol, Whi    | 1.779 | 10    | <b>0.063</b> | 3400, 0-1              | Naz, Set    | 2.377 | 84    | <b>0.007</b> |
| 1000                | 0-1, 4-5    | 2.290 | 976   | <b>0.017</b> | 3400                   | Naz, Slope  | 1.845 | 681   | <b>0.013</b> | 1000, 4-5              | Gol, Whi    | 1.466 | 10    | 0.101        | 3400, 0-1              | Naz, Slope  | 2.442 | 84    | <b>0.006</b> |
| 1000                | 1-2, 2-3    | 1.292 | 975   | 0.185        | 3400                   | Set, Slope  | 2.131 | 20    | <b>0.009</b> | 700, 0-1               | Gol, Whi    | 1.336 | 10    | 0.175        | 3400, 0-1              | Set, Slope  | 2.145 | 10    | <b>0.026</b> |
| 1000                | 1-2, 3-4    | 1.637 | 978   | 0.075        | 3400                   | 0-1, 1-2    | 1.462 | 999   | 0.085        | 700, 1-2               | Gol, Whi    | 1.511 | 10    | <b>0.097</b> | 3400, 1-2              | Cas, Naz    | 2.027 | 35    | <b>0.022</b> |
| 1000                | 1-2, 4-5    | 2.133 | 968   | <b>0.018</b> | 3400                   | 0-1, 2-3    | 1.980 | 999   | <b>0.016</b> | 700, 2-3               | Gol, Whi    | 1.577 | 10    | <b>0.092</b> | 3400, 1-2              | Cas, Set    | 1.477 | 10    | 0.132        |
| 1000                | 2-3, 3-4    | 1.153 | 979   | 0.297        | 3400                   | 0-1, 3-4    | 2.107 | 999   | <b>0.004</b> | 700, 3-4               | Gol, Whi    | 1.839 | 10    | <b>0.072</b> | 3400, 1-2              | Cas, Slope  | 1.843 | 4     | 0.128        |
| 1000                | 2-3, 4-5    | 1.604 | 974   | 0.096        | 3400                   | 0-1, 4-5    | 2.069 | 998   | <b>0.007</b> | 700, 4-5               | Gol, Whi    | 1.928 | 10    | <b>0.045</b> | 3400, 1-2              | Naz, Set    | 1.926 | 35    | <b>0.023</b> |
| 1000                | 3-4, 4-5    | 1.344 | 977   | 0.169        | 3400                   | 1-2, 2-3    | 1.288 | 997   | 0.149        | Within Ar x SD         |             |       |       |              | 3400, 1-2              | Naz, Slope  | 1.367 | 5     | 0.208        |
| 700                 | Gol, Whi    | 2.241 | 60    | <b>0.001</b> | 3400                   | 1-2, 3-4    | 1.620 | 999   | <b>0.040</b> | Gol, 0-1               | 1000, 700   | 1.098 | 10    | 0.344        | 3400, 1-2              | Set, Slope  | 1.666 | 4     | 0.166        |
| 700                 | 0-1, 1-2    | 1.992 | 970   | <b>0.031</b> | 3400                   | 1-2, 4-5    | 1.697 | 998   | <b>0.037</b> | Gol, 1-2               | 1000, 700   | 1.146 | 10    | 0.312        | 3400, 2-3              | Cas, Naz    | 2.036 | 35    | <b>0.022</b> |
| 700                 | 0-1, 2-3    | 2.166 | 969   | <b>0.017</b> | 3400                   | 2-3, 3-4    | 1.180 | 998   | 0.210        | Gol, 2-3               | 1000, 700   | 1.330 | 10    | 0.192        | 3400, 2-3              | Cas, Set    | 1.601 | 10    | 0.098        |
| 700                 | 0-1, 3-4    | 2.684 | 998   | <b>0.019</b> | 3400                   | 2-3, 4-5    | 1.434 | 999   | 0.075        | Gol, 3-4               | 1000, 700   | 1.290 | 10    | 0.234        | 3400, 2-3              | Cas, Slope  | 1.703 | 4     | 0.151        |
| 700                 | 0-1, 4-5    | 2.643 | 975   | <b>0.008</b> | 3400                   | 3-4, 4-5    | 0.981 | 999   | 0.460        | Gol, 4-5               | 1000, 700   | 1.265 | 10    | 0.206        | 3400, 2-3              | Naz, Set    | 1.827 | 35    | <b>0.024</b> |
| 700                 | 1-2, 2-3    | 1.373 | 974   | 0.158        | 4300                   | Cas, Naz    | 2.018 | 20    | <b>0.009</b> | Whi, 0-1               | 1000, 700   | 1.772 | 10    | <b>0.043</b> | 3400, 2-3              | Naz, Slope  | 1.385 | 5     | 0.186        |
| 700                 | 1-2, 3-4    | 1.778 | 998   | 0.087        | 4300                   | Cas, Set    | 1.501 | 10    | <b>0.027</b> | Whi, 1-2               | 1000, 700   | 1.662 | 10    | <b>0.053</b> | 3400, 2-3              | Set, Slope  | 1.423 | 4     | 0.256        |
| 700                 | 1-2, 4-5    | 1.973 | 974   | <b>0.035</b> | 4300                   | Cas, Slope  | 1.963 | 20    | <b>0.009</b> | Whi, 2-3               | 1000, 700   | 2.184 | 10    | <b>0.020</b> | 3400, 3-4              | Cas, Naz    | 2.148 | 35    | <b>0.009</b> |
| 700                 | 2-3, 3-4    | 1.248 | 998   | 0.236        | 4300                   | Naz, Set    | 2.087 | 20    | <b>0.008</b> | Whi, 3-4               | 1000, 700   | 2.313 | 10    | <b>0.018</b> | 3400, 3-4              | Cas, Set    | 2.104 | 10    | <b>0.018</b> |
| 700                 | 2-3, 4-5    | 1.401 | 974   | 0.140        | 4300                   | Naz, Slope  | 1.845 | 10    | 0.055        | Whi, 4-5               | 1000, 700   | 2.141 | 10    | <b>0.026</b> | 3400, 3-4              | Cas, Slope  | 1.921 | 4     | 0.122        |
| 700                 | 3-4, 4-5    | 1.118 | 997   | 0.328        | 4300                   | Set, Slope  | 1.915 | 20    | <b>0.013</b> | Within Ar x WD         |             |       |       |              | 3400, 3-4              | Naz, Set    | 1.969 | 35    | <b>0.027</b> |
| Within Ar           | Comparisons | t     | perms | P(MC)        | 4300                   | 0-1, 1-2    | 1.452 | 997   | 0.138        | Gol, 1000              | 0-1, 1-2    | 1.913 | 38    | 0.112        | 3400, 3-4              | Naz, Slope  | 1.656 | 5     | 0.083        |
| Gol                 | 1000, 700   | 1.545 | 60    | <b>0.029</b> | 4300                   | 0-1, 2-3    | 1.820 | 998   | <b>0.049</b> | Gol, 1000              | 0-1, 2-3    | 1.669 | 38    | 0.165        | 3400, 3-4              | Set, Slope  | 1.956 | 4     | 0.117        |
| Gol                 | 0-1, 1-2    | 2.164 | 978   | <b>0.027</b> | 4300                   | 0-1, 3-4    | 1.890 | 998   | <b>0.043</b> | Gol, 1000              | 0-1, 3-4    | 1.948 | 38    | 0.113        | 3400, 4-5              | Cas, Naz    | 1.685 | 35    | <b>0.049</b> |
| Gol                 | 0-1, 2-3    | 2.070 | 973   | <b>0.027</b> | 4300                   | 0-1, 4-5    | 2.452 | 999   | <b>0.019</b> | Gol, 1000              | 0-1, 4-5    | 1.821 | 38    | 0.118        | 3400, 4-5              | Cas, Set    | 1.839 | 10    | <b>0.046</b> |
| Gol                 | 0-1, 3-4    | 2.126 | 998   | <b>0.048</b> | 4300                   | 1-2, 2-3    | 1.823 | 998   | <b>0.047</b> | Gol, 1000              | 1-2, 2-3    | 1.211 | 38    | 0.308        | 3400, 4-5              | Cas, Slope  | 1.957 | 4     | 0.102        |
| Gol                 | 0-1, 4-5    | 2.177 | 978   | <b>0.029</b> | 4300                   | 1-2, 3-4    | 1.236 | 998   | 0.232        | Gol, 1000              | 1-2, 3-4    | 1.397 | 38    | 0.237        | 3400, 4-5              | Naz, Set    | 1.440 | 35    | 0.107        |
| Gol                 | 1-2, 2-3    | 1.451 | 978   | 0.146        | 4300                   | 1-2, 4-5    | 1.897 | 999   | <b>0.039</b> | Gol, 1000              | 1-2, 4-5    | 1.852 | 38    | 0.122        | 3400, 4-5              | Naz, Slope  | 1.478 | 5     | 0.164        |
| Gol                 | 1-2, 3-4    | 1.729 | 998   | 0.095        | 4300                   | 2-3, 3-4    | 0.962 | 999   | 0.467        | Gol, 1000              | 2-3, 3-4    | 1.161 | 38    | 0.359        | 3400, 4-5              | Set, Slope  | 1.854 | 4     | 0.127        |
| Gol                 | 1-2, 4-5    | 2.125 | 981   | <b>0.022</b> | 4300                   | 2-3, 4-5    | 1.600 | 999   | 0.077        | Gol, 1000              | 2-3, 4-5    | 1.523 | 38    | 0.191        | 4300, 0-1              | Cas, Naz    | 1.973 | 10    | <b>0.030</b> |
| Gol                 | 2-3, 3-4    | 1.143 | 998   | 0.296        | 4300                   | 3-4, 4-5    | 1.027 | 998   | 0.393        | Gol, 1000              | 3-4, 4-5    | 1.169 | 38    | 0.352        | 4300, 0-1              | Cas, Set    | 0.996 | 10    | 0.429        |
| Gol                 | 2-3, 4-5    | 1.558 | 980   | 0.092        | Within Ar              |             |       |       |              | Gol, 700               | 0-1, 1-2    | 1.599 | 38    | 0.171        | 4300, 0-1              | Cas, Slope  | 1.727 | 10    | 0.061        |
| Gol                 | 3-4, 4-5    | 1.032 | 998   | 0.441        | Cas                    | 3400, 4300  | 1.363 | 10    | 0.083        | Gol, 700               | 0-1, 2-3    | 1.612 | 38    | 0.164        | 4300, 0-1              | Naz, Set    | 2.014 | 10    | <b>0.032</b> |
| Whi                 | 1000, 700   | 2.722 | 10    | <b>0.002</b> | Cas                    | 0-1, 1-2    | 1.334 | 980   | 0.182        | Gol, 700               | 0-1, 3-4    | 1.508 | 15    | 0.318        | 4300, 0-1              | Naz, Slope  | 1.755 | 10    | 0.057        |
| Whi                 | 0-1, 1-2    | 1.556 | 977   | 0.091        | Cas                    | 0-1, 2-3    | 1.684 | 967   | 0.072        | Gol, 700               | 0-1, 4-5    | 1.718 | 38    | 0.115        | 4300, 0-1              | Set, Slope  | 1.728 | 10    | 0.058        |

|           |             |       |       |              |           |             |       |       |              |           |          |       |    |              |                |             |       |       |              |
|-----------|-------------|-------|-------|--------------|-----------|-------------|-------|-------|--------------|-----------|----------|-------|----|--------------|----------------|-------------|-------|-------|--------------|
| Whi       | 0-1, 2-3    | 2.235 | 974   | <b>0.026</b> | Cas       | 0-1, 3-4    | 2.182 | 976   | <b>0.026</b> | Gol, 700  | 1-2, 2-3 | 1.309 | 38 | 0.284        | 4300, 1-2      | Cas, Naz    | 1.524 | 4     | 0.172        |
| Whi       | 0-1, 3-4    | 2.866 | 981   | <b>0.008</b> | Cas       | 0-1, 4-5    | 2.405 | 973   | <b>0.013</b> | Gol, 700  | 1-2, 3-4 | 1.532 | 15 | 0.297        | 4300, 1-2      | Cas, Set    | 1.253 | 10    | 0.239        |
| Whi       | 0-1, 4-5    | 2.715 | 979   | <b>0.012</b> | Cas       | 1-2, 2-3    | 1.552 | 966   | 0.101        | Gol, 700  | 1-2, 4-5 | 1.519 | 38 | 0.175        | 4300, 1-2      | Cas, Slope  | 1.638 | 4     | 0.150        |
| Whi       | 1-2, 2-3    | 1.518 | 972   | 0.102        | Cas       | 1-2, 3-4    | 1.823 | 972   | 0.054        | Gol, 700  | 2-3, 3-4 | 0.979 | 15 | 0.482        | 4300, 1-2      | Naz, Set    | 1.574 | 4     | 0.176        |
| Whi       | 1-2, 3-4    | 1.853 | 978   | <b>0.050</b> | Cas       | 1-2, 4-5    | 1.941 | 975   | <b>0.031</b> | Gol, 700  | 2-3, 4-5 | 1.143 | 38 | 0.380        | 4300, 1-2      | Set, Slope  | 1.574 | 4     | 0.184        |
| Whi       | 1-2, 4-5    | 2.146 | 978   | <b>0.028</b> | Cas       | 2-3, 3-4    | 1.376 | 977   | 0.150        | Gol, 700  | 3-4, 4-5 | 0.982 | 15 | 0.537        | 4300, 2-3      | Cas, Naz    | 1.893 | 4     | 0.104        |
| Whi       | 2-3, 3-4    | 1.343 | 984   | 0.160        | Cas       | 2-3, 4-5    | 1.745 | 967   | 0.064        | Whi, 1000 | 0-1, 1-2 | 1.114 | 38 | 0.378        | 4300, 2-3      | Cas, Set    | 1.114 | 10    | 0.318        |
| Whi       | 2-3, 4-5    | 1.605 | 981   | 0.091        | Cas       | 3-4, 4-5    | 1.312 | 974   | 0.206        | Whi, 1000 | 0-1, 2-3 | 2.124 | 38 | <b>0.084</b> | 4300, 2-3      | Cas, Slope  | 1.702 | 4     | 0.150        |
| Whi       | 3-4, 4-5    | 1.347 | 973   | 0.159        | Naz       | 3400, 4300  | 1.661 | 681   | 0.027        | Whi, 1000 | 0-1, 3-4 | 1.909 | 38 | <b>0.099</b> | 4300, 2-3      | Naz, Set    | 1.928 | 4     | 0.102        |
| Within SD | Comparisons | t     | perms | P(MC)        | Naz       | 0-1, 1-2    | 1.253 | 997   | 0.239        | Whi, 1000 | 0-1, 4-5 | 1.920 | 38 | 0.113        | 4300, 2-3      | Set, Slope  | 1.817 | 4     | 0.138        |
| 0-1       | Gol, Whi    | 1.642 | 982   | <b>0.031</b> | Naz       | 0-1, 2-3    | 1.762 | 998   | 0.082        | Whi, 1000 | 1-2, 2-3 | 1.561 | 38 | 0.189        | 4300, 3-4      | Cas, Naz    | 2.158 | 4     | 0.075        |
| 1-2       | Gol, Whi    | 1.959 | 985   | <b>0.005</b> | Naz       | 0-1, 3-4    | 1.718 | 999   | 0.091        | Whi, 1000 | 1-2, 3-4 | 1.558 | 38 | 0.192        | 4300, 3-4      | Cas, Set    | 1.137 | 10    | 0.315        |
| 2-3       | Gol, Whi    | 1.684 | 986   | <b>0.014</b> | Naz       | 0-1, 4-5    | 1.661 | 998   | 0.116        | Whi, 1000 | 1-2, 4-5 | 1.745 | 38 | 0.144        | 4300, 3-4      | Cas, Slope  | 1.904 | 4     | 0.108        |
| 3-4       | Gol, Whi    | 1.517 | 986   | <b>0.049</b> | Naz       | 1-2, 2-3    | 1.268 | 984   | 0.245        | Whi, 1000 | 2-3, 3-4 | 1.054 | 38 | 0.425        | 4300, 3-4      | Naz, Set    | 1.784 | 4     | 0.135        |
| 4-5       | Gol, Whi    | 1.557 | 990   | <b>0.040</b> | Naz       | 1-2, 3-4    | 1.131 | 986   | 0.359        | Whi, 1000 | 2-3, 4-5 | 1.328 | 38 | 0.266        | 4300, 3-4      | Set, Slope  | 1.667 | 4     | 0.144        |
| 0-1       | 1000, 700   | 1.537 | 985   | <b>0.038</b> | Naz       | 1-2, 4-5    | 1.213 | 985   | 0.288        | Whi, 1000 | 3-4, 4-5 | 1.335 | 38 | 0.271        | 4300, 4-5      | Cas, Naz    | 1.715 | 4     | 0.136        |
| 1-2       | 1000, 700   | 1.432 | 981   | 0.066        | Naz       | 2-3, 3-4    | 1.100 | 983   | 0.350        | Whi, 700  | 0-1, 1-2 | 1.578 | 38 | 0.194        | 4300, 4-5      | Cas, Set    | 1.174 | 10    | 0.296        |
| 2-3       | 1000, 700   | 1.589 | 980   | <b>0.035</b> | Naz       | 2-3, 4-5    | 0.920 | 982   | 0.468        | Whi, 700  | 0-1, 2-3 | 2.017 | 38 | 0.100        | 4300, 4-5      | Cas, Slope  | 1.866 | 4     | 0.123        |
| 3-4       | 1000, 700   | 1.414 | 983   | 0.084        | Naz       | 3-4, 4-5    | 0.747 | 986   | 0.677        | Whi, 700  | 0-1, 3-4 | 3.101 | 38 | <b>0.033</b> | 4300, 4-5      | Naz, Set    | 2.070 | 4     | 0.084        |
| 4-5       | 1000, 700   | 1.598 | 985   | <b>0.035</b> | Set       | 3400, 4300  | 2.689 | 10    | <b>0.001</b> | Whi, 700  | 0-1, 4-5 | 2.669 | 38 | <b>0.055</b> | 4300, 4-5      | Set, Slope  | 1.961 | 4     | 0.090        |
|           |             |       |       |              | Set       | 0-1, 1-2    | 1.571 | 974   | 0.094        | Whi, 700  | 1-2, 2-3 | 1.385 | 38 | 0.267        | Within Ar x SD | Comparisons | t     | perms | P(MC)        |
|           |             |       |       |              | Set       | 0-1, 2-3    | 2.030 | 971   | <b>0.033</b> | Whi, 700  | 1-2, 3-4 | 1.724 | 38 | 0.120        | Cas, 0-1       | 3400, 4300  | 0.817 | 10    | 0.633        |
|           |             |       |       |              | Set       | 0-1, 3-4    | 2.229 | 980   | <b>0.027</b> | Whi, 700  | 1-2, 4-5 | 1.958 | 38 | 0.109        | Cas, 1-2       | 3400, 4300  | 1.444 | 10    | 0.136        |
|           |             |       |       |              | Set       | 0-1, 4-5    | 2.240 | 969   | <b>0.027</b> | Whi, 700  | 2-3, 3-4 | 1.200 | 38 | 0.331        | Cas, 2-3       | 3400, 4300  | 1.209 | 10    | 0.271        |
|           |             |       |       |              | Set       | 1-2, 2-3    | 1.587 | 977   | 0.077        | Whi, 700  | 2-3, 4-5 | 1.327 | 38 | 0.236        | Cas, 3-4       | 3400, 4300  | 0.951 | 10    | 0.501        |
|           |             |       |       |              | Set       | 1-2, 3-4    | 1.776 | 973   | <b>0.045</b> | Whi, 700  | 3-4, 4-5 | 1.097 | 38 | 0.372        | Cas, 4-5       | 3400, 4300  | 1.274 | 10    | 0.212        |
|           |             |       |       |              | Set       | 1-2, 4-5    | 1.979 | 971   | <b>0.036</b> |           |          |       |    |              | Naz, 0-1       | 3400, 4300  | 2.342 | 84    | <b>0.005</b> |
|           |             |       |       |              | Set       | 2-3, 3-4    | 1.078 | 978   | 0.337        |           |          |       |    |              | Naz, 1-2       | 3400, 4300  | 1.612 | 5     | 0.119        |
|           |             |       |       |              | Set       | 2-3, 4-5    | 1.444 | 977   | 0.136        |           |          |       |    |              | Naz, 2-3       | 3400, 4300  | 1.551 | 5     | 0.139        |
|           |             |       |       |              | Set       | 3-4, 4-5    | 1.246 | 980   | 0.228        |           |          |       |    |              | Naz, 3-4       | 3400, 4300  | 1.613 | 5     | 0.108        |
|           |             |       |       |              | Slope     | 3400, 4300  | 1.457 | 10    | 0.101        |           |          |       |    |              | Naz, 4-5       | 3400, 4300  | 1.361 | 5     | 0.204        |
|           |             |       |       |              | Within SD | Comparisons | t     | perms | P(MC)        |           |          |       |    |              | Set, 0-1       | 3400, 4300  | 1.261 | 10    | 0.227        |
|           |             |       |       |              | 0-1       | Cas, Naz    | 2.351 | 998   | <b>0.003</b> |           |          |       |    |              | Set, 1-2       | 3400, 4300  | 1.651 | 10    | 0.072        |
|           |             |       |       |              | 0-1       | Cas, Set    | 1.096 | 980   | 0.294        |           |          |       |    |              | Set, 2-3       | 3400, 4300  | 1.641 | 10    | 0.075        |
|           |             |       |       |              | 0-1       | Cas, Slope  | 2.348 | 990   | <b>0.004</b> |           |          |       |    |              | Set, 3-4       | 3400, 4300  | 2.023 | 10    | <b>0.029</b> |
|           |             |       |       |              | 0-1       | Naz, Set    | 2.445 | 999   | <b>0.001</b> |           |          |       |    |              | Set, 4-5       | 3400, 4300  | 2.086 | 10    | <b>0.024</b> |
|           |             |       |       |              | 0-1       | Naz, Slope  | 2.257 | 999   | <b>0.001</b> |           |          |       |    |              | Slope, 0-1     | 3400, 4300  | 1.108 | 10    | 0.300        |
|           |             |       |       |              | 0-1       | Set, Slope  | 2.536 | 984   | <b>0.002</b> |           |          |       |    |              | Within Ar x WD | Comparisons | t     | perms | P(MC)        |
|           |             |       |       |              | 0-1       | 3400, 4300  | 1.484 | 998   | <b>0.018</b> |           |          |       |    |              | Cas, 3400      | 0-1, 1-2    | 1.369 | 38    | 0.228        |
|           |             |       |       |              | 1-2       | Cas, Naz    | 1.621 | 972   | <b>0.039</b> |           |          |       |    |              | Cas, 3400      | 0-1, 2-3    | 1.453 | 38    | 0.189        |
|           |             |       |       |              | 1-2       | Cas, Set    | 1.118 | 988   | 0.291        |           |          |       |    |              | Cas, 3400      | 0-1, 3-4    | 1.897 | 38    | 0.118        |
|           |             |       |       |              | 1-2       | Cas, Slope  | 2.085 | 174   | <b>0.035</b> |           |          |       |    |              | Cas, 3400      | 0-1, 4-5    | 2.034 | 38    | 0.095        |
|           |             |       |       |              | 1-2       | Naz, Set    | 1.500 | 970   | 0.059        |           |          |       |    |              | Cas, 3400      | 1-2, 2-3    | 1.587 | 38    | 0.166        |
|           |             |       |       |              | 1-2       | Naz, Slope  | 1.262 | 70    | 0.271        |           |          |       |    |              | Cas, 3400      | 1-2, 3-4    | 1.789 | 38    | 0.143        |
|           |             |       |       |              | 1-2       | Set, Slope  | 1.932 | 172   | <b>0.039</b> |           |          |       |    |              | Cas, 3400      | 1-2, 4-5    | 1.691 | 38    | 0.158        |
|           |             |       |       |              | 1-2       | 3400, 4300  | 1.494 | 999   | <b>0.036</b> |           |          |       |    |              | Cas, 3400      | 2-3, 3-4    | 1.167 | 38    | 0.332        |
|           |             |       |       |              | 2-3       | Cas, Naz    | 2.057 | 969   | <b>0.017</b> |           |          |       |    |              | Cas, 3400      | 2-3, 4-5    | 1.402 | 38    | 0.240        |

|     |            |       |     |              |
|-----|------------|-------|-----|--------------|
| 2-3 | Cas, Set   | 1.361 | 981 | 0.102        |
| 2-3 | Cas, Slope | 1.928 | 172 | <b>0.042</b> |
| 2-3 | Naz, Set   | 1.729 | 970 | <b>0.036</b> |
| 2-3 | Naz, Slope | 1.386 | 70  | 0.184        |
| 2-3 | Set, Slope | 1.776 | 171 | 0.053        |
| 2-3 | 3400, 4300 | 1.430 | 999 | <b>0.044</b> |
| 3-4 | Cas, Naz   | 2.166 | 975 | <b>0.005</b> |
| 3-4 | Cas, Set   | 1.598 | 987 | <b>0.043</b> |
| 3-4 | Cas, Slope | 2.416 | 171 | <b>0.022</b> |
| 3-4 | Naz, Set   | 1.720 | 969 | <b>0.025</b> |
| 3-4 | Naz, Slope | 1.360 | 70  | 0.205        |
| 3-4 | Set, Slope | 2.149 | 172 | <b>0.026</b> |
| 3-4 | 3400, 4300 | 1.374 | 997 | 0.079        |
| 4-5 | Cas, Naz   | 1.767 | 970 | <b>0.027</b> |
| 4-5 | Cas, Set   | 1.226 | 982 | 0.201        |
| 4-5 | Cas, Slope | 2.403 | 175 | <b>0.015</b> |
| 4-5 | Naz, Set   | 1.278 | 974 | 0.167        |
| 4-5 | Naz, Slope | 1.348 | 70  | 0.223        |
| 4-5 | Set, Slope | 2.276 | 173 | <b>0.015</b> |
| 4-5 | 3400, 4300 | 1.342 | 999 | 0.098        |

|           |          |       |     |              |
|-----------|----------|-------|-----|--------------|
| Cas, 3400 | 3-4, 4-5 | 1.390 | 38  | 0.254        |
| Cas, 4300 | 0-1, 1-2 | 1.226 | 38  | 0.290        |
| Cas, 4300 | 0-1, 2-3 | 1.271 | 38  | 0.307        |
| Cas, 4300 | 0-1, 3-4 | 1.477 | 38  | 0.229        |
| Cas, 4300 | 0-1, 4-5 | 1.751 | 38  | 0.138        |
| Cas, 4300 | 1-2, 2-3 | 1.310 | 38  | 0.258        |
| Cas, 4300 | 1-2, 3-4 | 1.055 | 38  | 0.399        |
| Cas, 4300 | 1-2, 4-5 | 1.450 | 38  | 0.233        |
| Cas, 4300 | 2-3, 3-4 | 0.980 | 38  | 0.444        |
| Cas, 4300 | 2-3, 4-5 | 1.542 | 38  | 0.192        |
| Cas, 4300 | 3-4, 4-5 | 0.981 | 38  | 0.473        |
| Naz, 3400 | 0-1, 1-2 | 1.080 | 901 | 0.372        |
| Naz, 3400 | 0-1, 2-3 | 1.914 | 904 | 0.082        |
| Naz, 3400 | 0-1, 3-4 | 1.952 | 911 | <b>0.049</b> |
| Naz, 3400 | 0-1, 4-5 | 1.615 | 924 | 0.131        |
| Naz, 3400 | 1-2, 2-3 | 1.365 | 366 | 0.177        |
| Naz, 3400 | 1-2, 3-4 | 1.560 | 363 | 0.142        |
| Naz, 3400 | 1-2, 4-5 | 1.285 | 374 | 0.220        |
| Naz, 3400 | 2-3, 3-4 | 0.997 | 367 | 0.444        |
| Naz, 3400 | 2-3, 4-5 | 0.922 | 363 | 0.490        |
| Naz, 3400 | 3-4, 4-5 | 0.788 | 373 | 0.610        |
| Set, 3400 | 0-1, 1-2 | 1.708 | 38  | 0.152        |
| Set, 3400 | 0-1, 2-3 | 1.805 | 38  | 0.147        |
| Set, 3400 | 0-1, 3-4 | 2.732 | 38  | <b>0.047</b> |
| Set, 3400 | 0-1, 4-5 | 2.107 | 38  | 0.103        |
| Set, 3400 | 1-2, 2-3 | 1.560 | 38  | 0.173        |
| Set, 3400 | 1-2, 3-4 | 2.425 | 38  | 0.056        |
| Set, 3400 | 1-2, 4-5 | 2.134 | 38  | 0.094        |
| Set, 3400 | 2-3, 3-4 | 1.334 | 38  | 0.235        |
| Set, 3400 | 2-3, 4-5 | 1.638 | 38  | 0.160        |
| Set, 3400 | 3-4, 4-5 | 1.379 | 38  | 0.233        |
| Set, 4300 | 0-1, 1-2 | 1.207 | 38  | 0.345        |
| Set, 4300 | 0-1, 2-3 | 1.435 | 38  | 0.247        |
| Set, 4300 | 0-1, 3-4 | 1.231 | 38  | 0.326        |
| Set, 4300 | 0-1, 4-5 | 1.580 | 38  | 0.204        |
| Set, 4300 | 1-2, 2-3 | 1.561 | 38  | 0.175        |
| Set, 4300 | 1-2, 3-4 | 1.112 | 38  | 0.393        |
| Set, 4300 | 1-2, 4-5 | 1.285 | 38  | 0.302        |
| Set, 4300 | 2-3, 3-4 | 0.839 | 38  | 0.565        |
| Set, 4300 | 2-3, 4-5 | 1.142 | 38  | 0.355        |
| Set, 4300 | 3-4, 4-5 | 0.848 | 38  | 0.583        |

8

9

10

11

**Table B2.** 4-factor PERMANOVA pairwise test results for significant double and three-way interactions based on structural diversity data . Ar: area; WD: water depth; SD: sediment depth; perms: possible; permutations; P(MC): Monte-Carlo p-values. Bold P(MC) values:  $p < 0.05$ ; bold, italic values:  $p < 0.01$ . Gol: Gollum channels; Whi: Whittard Cayon; Cas: Cascais Canyon; Set: Setúbal Canyon; Naz: Nazaré Canyon.

| Irish Margin        |             |       |         |       |              | Irish Margin           |             |       |         |       |              | Western Iberian Margin |             |       |         |       |              |
|---------------------|-------------|-------|---------|-------|--------------|------------------------|-------------|-------|---------|-------|--------------|------------------------|-------------|-------|---------|-------|--------------|
| Double interactions |             |       |         |       |              | Three-way interactions |             |       |         |       |              | Three-way interactions |             |       |         |       |              |
| Within WD           | Comparisons | t     | P(perm) | perms | P(MC)        | Within WD x SD         | Comparisons | t     | P(perm) | perms | P(MC)        | Within WD x SD         | Comparisons | t     | P(perm) | perms | P(MC)        |
| 1000                | Gol, Whi    | 2.828 | 0.082   | 10    | <b>0.012</b> | 1000, 0-1              | Gol, Whi    | 3.719 | 0.100   | 10    | <b>0.010</b> | 3400, 0-1              | Cas, Naz    | 2.123 | 0.051   | 84    | <b>0.037</b> |
| 1000                | 0-1, 1-2    | 4.207 | 0.012   | 967   | <b>0.006</b> | 1000, 1-2              | Gol, Whi    | 1.418 | 0.319   | 10    | 0.211        | 3400, 0-1              | Cas, Set    | 0.403 | 0.900   | 10    | 0.835        |
| 1000                | 0-1, 2-3    | 3.199 | 0.030   | 970   | <b>0.021</b> | 1000, 2-3              | Gol, Whi    | 1.407 | 0.306   | 10    | 0.196        | 3400, 0-1              | Cas, Slope  | 0.271 | 1.000   | 10    | 0.963        |
| 1000                | 0-1, 3-4    | 2.715 | 0.048   | 973   | <b>0.039</b> | 1000, 3-4              | Gol, Whi    | 1.803 | 0.216   | 10    | 0.121        | 3400, 0-1              | Naz, Set    | 2.260 | 0.041   | 84    | <b>0.032</b> |
| 1000                | 0-1, 4-5    | 2.589 | 0.029   | 969   | <b>0.032</b> | 1000, 4-5              | Gol, Whi    | 1.243 | 0.295   | 10    | 0.270        | 3400, 0-1              | Naz, Slope  | 2.027 | 0.053   | 84    | <b>0.033</b> |
| 1000                | 1-2, 2-3    | 0.780 | 0.529   | 972   | 0.501        | 700, 0-1               | Gol, Whi    | 1.245 | 0.206   | 10    | 0.287        | 3400, 0-1              | Set, Slope  | 0.584 | 0.807   | 10    | 0.698        |
| 1000                | 1-2, 3-4    | 0.864 | 0.512   | 980   | 0.472        | 700, 1-2               | Gol, Whi    | 3.550 | 0.108   | 10    | <b>0.019</b> | 3400, 1-2              | Cas, Naz    | 1.453 | 0.094   | 35    | 0.179        |
| 1000                | 1-2, 4-5    | 1.363 | 0.214   | 981   | 0.216        | 700, 2-3               | Gol, Whi    | 0.918 | 0.505   | 10    | 0.425        | 3400, 1-2              | Cas, Set    | 1.639 | 0.202   | 10    | 0.153        |
| 1000                | 2-3, 3-4    | 1.382 | 0.199   | 970   | 0.220        | 700, 3-4               | Gol, Whi    | 2.257 | 0.093   | 10    | 0.097        | 3400, 1-2              | Cas, Slope  | 3.890 | 0.256   | 4     | <b>0.024</b> |
| 1000                | 2-3, 4-5    | 1.868 | 0.083   | 982   | 0.083        | 700, 4-5               | Gol, Whi    | 2.582 | 0.110   | 10    | 0.063        | 3400, 1-2              | Naz, Set    | 1.166 | 0.367   | 35    | 0.283        |
| 1000                | 3-4, 4-5    | 1.375 | 0.232   | 971   | 0.208        | Within Ar x SD         |             |       |         |       |              | 3400, 1-2              | Naz, Slope  | 0.650 | 0.794   | 5     | 0.670        |
| 700                 | Gol, Whi    | 1.584 | 0.200   | 60    | 0.167        | Gol, 0-1               | 1000, 700   | 0.726 | 0.688   | 10    | 0.576        | 3400, 1-2              | Set, Slope  | 0.720 | 0.765   | 4     | 0.597        |
| 700                 | 0-1, 1-2    | 1.572 | 0.173   | 974   | 0.184        | Gol, 1-2               | 1000, 700   | 0.681 | 0.608   | 10    | 0.591        | 3400, 2-3              | Cas, Naz    | 0.637 | 0.607   | 35    | 0.635        |
| 700                 | 0-1, 2-3    | 2.505 | 0.069   | 974   | 0.054        | Gol, 2-3               | 1000, 700   | 1.880 | 0.206   | 10    | 0.122        | 3400, 2-3              | Cas, Set    | 0.677 | 0.692   | 10    | 0.599        |
| 700                 | 0-1, 3-4    | 5.663 | 0.009   | 996   | <b>0.009</b> | Gol, 3-4               | 1000, 700   | 1.226 | 0.272   | 10    | 0.291        | 3400, 2-3              | Cas, Slope  | 0.252 | 1.000   | 4     | 0.923        |
| 700                 | 0-1, 4-5    | 3.993 | 0.021   | 975   | <b>0.009</b> | Gol, 4-5               | 1000, 700   | 0.585 | 0.902   | 10    | 0.701        | 3400, 2-3              | Naz, Set    | 0.944 | 0.374   | 35    | 0.383        |
| 700                 | 1-2, 2-3    | 1.920 | 0.120   | 968   | 0.113        | Whi, 0-1               | 1000, 700   | 3.398 | 0.098   | 10    | <b>0.021</b> | 3400, 2-3              | Naz, Slope  | 0.417 | 0.796   | 5     | 0.841        |
| 700                 | 1-2, 3-4    | 2.499 | 0.071   | 998   | 0.066        | Whi, 1-2               | 1000, 700   | 4.197 | 0.103   | 10    | <b>0.007</b> | 3400, 2-3              | Set, Slope  | 0.444 | 1.000   | 4     | 0.845        |
| 700                 | 1-2, 4-5    | 8.804 | 0.002   | 968   | <b>0.001</b> | Whi, 2-3               | 1000, 700   | 1.483 | 0.195   | 10    | 0.218        | 3400, 3-4              | Cas, Naz    | 1.852 | 0.107   | 35    | 0.109        |
| 700                 | 2-3, 3-4    | 1.583 | 0.193   | 998   | 0.183        | Whi, 3-4               | 1000, 700   | 3.794 | 0.090   | 10    | <b>0.006</b> | 3400, 3-4              | Cas, Set    | 1.938 | 0.103   | 10    | 0.124        |
| 700                 | 2-3, 4-5    | 3.813 | 0.013   | 966   | <b>0.003</b> | Whi, 4-5               | 1000, 700   | 3.134 | 0.102   | 10    | <b>0.013</b> | 3400, 3-4              | Cas, Slope  | 0.135 | 1.000   | 4     | 0.935        |
| 700                 | 3-4, 4-5    | 0.673 | 0.602   | 997   | 0.611        | Within Ar x WD         |             |       |         |       |              | 3400, 3-4              | Naz, Set    | 1.441 | 0.178   | 35    | 0.156        |
| Within Ar           | Comparisons | t     | P(perm) | perms | P(MC)        | Gol, 1000              | 0-1, 1-2    | 6.129 | 0.095   | 38    | <b>0.019</b> | 3400, 3-4              | Naz, Slope  | 1.667 | 0.202   | 5     | 0.153        |
| Gol                 | 1000, 700   | 2.708 | 0.045   | 60    | <b>0.031</b> | Gol, 1000              | 0-1, 2-3    | 2.967 | 0.092   | 38    | 0.059        | 3400, 3-4              | Set, Slope  | 3.807 | 0.251   | 4     | <b>0.041</b> |
| Gol                 | 0-1, 1-2    | 4.178 | 0.015   | 969   | <b>0.020</b> | Gol, 1000              | 0-1, 3-4    | 3.374 | 0.167   | 38    | 0.067        | 3400, 4-5              | Cas, Naz    | 2.569 | 0.084   | 35    | <b>0.035</b> |
| Gol                 | 0-1, 2-3    | 3.635 | 0.015   | 973   | <b>0.011</b> | Gol, 1000              | 0-1, 4-5    | 2.845 | 0.158   | 38    | 0.089        | 3400, 4-5              | Cas, Set    | 3.195 | 0.094   | 10    | <b>0.030</b> |
| Gol                 | 0-1, 3-4    | 4.218 | 0.021   | 996   | <b>0.025</b> | Gol, 1000              | 1-2, 2-3    | 0.061 | 1.000   | 38    | 0.993        | 3400, 4-5              | Cas, Slope  | 0.927 | 0.753   | 4     | 0.483        |
| Gol                 | 0-1, 4-5    | 2.979 | 0.035   | 975   | <b>0.025</b> | Gol, 1000              | 1-2, 3-4    | 0.466 | 0.736   | 38    | 0.747        | 3400, 4-5              | Naz, Set    | 0.608 | 0.704   | 35    | 0.694        |
| Gol                 | 1-2, 2-3    | 0.666 | 0.553   | 970   | 0.565        | Gol, 1000              | 1-2, 4-5    | 1.027 | 0.410   | 38    | 0.407        | 3400, 4-5              | Naz, Slope  | 1.084 | 0.586   | 5     | 0.381        |
| Gol                 | 1-2, 3-4    | 0.500 | 0.759   | 997   | 0.723        | Gol, 1000              | 2-3, 3-4    | 0.735 | 0.671   | 38    | 0.612        | 3400, 4-5              | Set, Slope  | 1.397 | 0.268   | 4     | 0.251        |
| Gol                 | 1-2, 4-5    | 1.859 | 0.068   | 977   | 0.078        | Gol, 1000              | 2-3, 4-5    | 1.403 | 0.273   | 38    | 0.256        | 4300, 0-1              | Cas, Naz    | 1.549 | 0.078   | 10    | 0.164        |
| Gol                 | 2-3, 3-4    | 1.152 | 0.370   | 999   | 0.325        | Gol, 1000              | 3-4, 4-5    | 2.886 | 0.104   | 38    | 0.053        | 4300, 0-1              | Cas, Set    | 0.540 | 0.906   | 10    | 0.766        |
| Gol                 | 2-3, 4-5    | 2.518 | 0.028   | 982   | <b>0.037</b> | Gol, 700               | 0-1, 1-2    | 2.167 | 0.261   | 38    | 0.169        | 4300, 0-1              | Cas, Slope  | 2.048 | 0.206   | 10    | 0.080        |
| Gol                 | 3-4, 4-5    | 0.776 | 0.497   | 994   | 0.495        | Gol, 700               | 0-1, 2-3    | 2.190 | 0.228   | 38    | 0.149        | 4300, 0-1              | Naz, Set    | 2.602 | 0.071   | 10    | <b>0.026</b> |
| Whi                 | 1000, 700   | 3.241 | 0.106   | 10    | <b>0.004</b> | Gol, 700               | 0-1, 3-4    | 3.450 | 0.243   | 15    | 0.178        | 4300, 0-1              | Naz, Slope  | 4.142 | 0.119   | 10    | <b>0.006</b> |
| Whi                 | 0-1, 1-2    | 1.825 | 0.092   | 969   | 0.086        | Gol, 700               | 0-1, 4-5    | 1.924 | 0.220   | 38    | 0.168        | 4300, 0-1              | Set, Slope  | 2.333 | 0.097   | 10    | <b>0.066</b> |
| Whi                 | 0-1, 2-3    | 1.809 | 0.130   | 969   | 0.155        | Gol, 700               | 1-2, 2-3    | 2.182 | 0.197   | 38    | 0.106        | 4300, 1-2              | Cas, Naz    | 2.198 | 0.250   | 4     | 0.125        |

|           |             |       |         |       |              |           |          |        |       |    |              |                |             |       |         |       |              |
|-----------|-------------|-------|---------|-------|--------------|-----------|----------|--------|-------|----|--------------|----------------|-------------|-------|---------|-------|--------------|
| Whi       | 0-1, 3-4    | 3.358 | 0.023   | 974   | <b>0.022</b> | Gol, 700  | 1-2, 3-4 | 0.308  | 0.807 | 15 | 0.850        | 4300, 1-2      | Cas, Set    | 1.489 | 0.227   | 10    | 0.182        |
| Whi       | 0-1, 4-5    | 4.435 | 0.007   | 978   | <b>0.002</b> | Gol, 700  | 1-2, 4-5 | 3.049  | 0.105 | 38 | 0.056        | 4300, 1-2      | Cas, Slope  | 1.156 | 0.472   | 4     | 0.369        |
| Whi       | 1-2, 2-3    | 3.170 | 0.040   | 973   | <b>0.015</b> | Gol, 700  | 2-3, 3-4 | 0.849  | 0.639 | 15 | 0.561        | 4300, 1-2      | Naz, Set    | 0.992 | 0.482   | 4     | 0.407        |
| Whi       | 1-2, 3-4    | 5.372 | 0.004   | 973   | <b>0.001</b> | Gol, 700  | 2-3, 4-5 | 3.018  | 0.096 | 38 | 0.051        | 4300, 1-2      | Set, Slope  | 1.632 | 0.488   | 4     | 0.216        |
| Whi       | 1-2, 4-5    | 6.765 | 0.004   | 978   | <b>0.001</b> | Gol, 700  | 3-4, 4-5 | 0.281  | 0.936 | 15 | 0.859        | 4300, 2-3      | Cas, Naz    | 1.078 | 0.498   | 4     | 0.405        |
| Whi       | 2-3, 3-4    | 1.220 | 0.276   | 972   | 0.267        | Whi, 1000 | 0-1, 1-2 | 1.132  | 0.331 | 38 | 0.388        | 4300, 2-3      | Cas, Set    | 1.030 | 0.402   | 10    | 0.367        |
| Whi       | 2-3, 4-5    | 2.383 | 0.053   | 977   | <b>0.042</b> | Whi, 1000 | 0-1, 2-3 | 1.371  | 0.297 | 38 | 0.277        | 4300, 2-3      | Cas, Slope  | 0.924 | 0.491   | 4     | 0.446        |
| Whi       | 3-4, 4-5    | 3.444 | 0.009   | 971   | <b>0.010</b> | Whi, 1000 | 0-1, 3-4 | 1.288  | 0.334 | 38 | 0.304        | 4300, 2-3      | Naz, Set    | 1.680 | 0.252   | 4     | 0.178        |
| Within SD | Comparisons | t     | P(perm) | perms | P(MC)        | Whi, 1000 | 0-1, 4-5 | 1.424  | 0.287 | 38 | 0.274        | 4300, 2-3      | Set, Slope  | 1.185 | 0.480   | 4     | 0.335        |
| 0-1       | Gol, Whi    | 3.210 | 0.008   | 978   | <b>0.008</b> | Whi, 1000 | 1-2, 2-3 | 1.583  | 0.276 | 38 | 0.218        | 4300, 3-4      | Cas, Naz    | 5.310 | 0.227   | 4     | <b>0.039</b> |
| 1-2       | Gol, Whi    | 3.161 | 0.025   | 986   | <b>0.014</b> | Whi, 1000 | 1-2, 3-4 | 1.108  | 0.280 | 38 | 0.394        | 4300, 3-4      | Cas, Set    | 0.831 | 0.697   | 10    | 0.501        |
| 2-3       | Gol, Whi    | 1.563 | 0.113   | 987   | 0.106        | Whi, 1000 | 1-2, 4-5 | 1.707  | 0.188 | 38 | 0.187        | 4300, 3-4      | Cas, Slope  | 4.632 | 0.252   | 4     | <b>0.041</b> |
| 3-4       | Gol, Whi    | 0.617 | 0.682   | 987   | 0.659        | Whi, 1000 | 2-3, 3-4 | 2.542  | 0.176 | 38 | 0.105        | 4300, 3-4      | Naz, Set    | 2.635 | 0.259   | 4     | 0.103        |
| 4-5       | Gol, Whi    | 2.193 | 0.031   | 989   | <b>0.041</b> | Whi, 1000 | 2-3, 4-5 | 1.332  | 0.429 | 38 | 0.300        | 4300, 3-4      | Set, Slope  | 2.192 | 0.250   | 4     | 0.122        |
| 0-1       | 1000, 700   | 2.297 | 0.047   | 979   | <b>0.035</b> | Whi, 1000 | 3-4, 4-5 | 1.594  | 0.214 | 38 | 0.216        | 4300, 4-5      | Cas, Naz    | 2.500 | 0.279   | 4     | 0.105        |
| 1-2       | 1000, 700   | 2.341 | 0.029   | 981   | <b>0.040</b> | Whi, 700  | 0-1, 1-2 | 1.463  | 0.238 | 38 | 0.233        | 4300, 4-5      | Cas, Set    | 0.451 | 0.831   | 10    | 0.769        |
| 2-3       | 1000, 700   | 2.340 | 0.045   | 988   | 0.055        | Whi, 700  | 0-1, 2-3 | 1.388  | 0.277 | 38 | 0.286        | 4300, 4-5      | Cas, Slope  | 1.588 | 0.239   | 4     | 0.244        |
| 3-4       | 1000, 700   | 0.421 | 0.845   | 987   | 0.834        | Whi, 700  | 0-1, 3-4 | 4.757  | 0.087 | 38 | <b>0.033</b> | 4300, 4-5      | Naz, Set    | 6.389 | 0.249   | 4     | <b>0.011</b> |
| 4-5       | 1000, 700   | 1.374 | 0.189   | 987   | 0.178        | Whi, 700  | 0-1, 4-5 | 6.121  | 0.100 | 38 | <b>0.029</b> | 4300, 4-5      | Set, Slope  | 3.870 | 0.271   | 4     | <b>0.024</b> |
|           |             |       |         |       |              | Whi, 700  | 1-2, 2-3 | 2.923  | 0.107 | 38 | 0.100        | Within Ar x SD | Comparisons | t     | P(perm) | perms | P(MC)        |
|           |             |       |         |       |              | Whi, 700  | 1-2, 3-4 | 10.189 | 0.092 | 38 | <b>0.005</b> | Cas, 0-1       | 3400, 4300  | 2.154 | 0.207   | 10    | 0.072        |
|           |             |       |         |       |              | Whi, 700  | 1-2, 4-5 | 13.738 | 0.104 | 38 | <b>0.006</b> | Cas, 1-2       | 3400, 4300  | 0.372 | 0.906   | 10    | 0.864        |
|           |             |       |         |       |              | Whi, 700  | 2-3, 3-4 | 2.212  | 0.247 | 38 | 0.159        | Cas, 2-3       | 3400, 4300  | 0.940 | 0.596   | 10    | 0.418        |
|           |             |       |         |       |              | Whi, 700  | 2-3, 4-5 | 3.652  | 0.101 | 38 | 0.054        | Cas, 3-4       | 3400, 4300  | 0.274 | 0.901   | 10    | 0.847        |
|           |             |       |         |       |              | Whi, 700  | 3-4, 4-5 | 6.952  | 0.126 | 38 | <b>0.016</b> | Cas, 4-5       | 3400, 4300  | 0.463 | 1.000   | 10    | 0.778        |
|           |             |       |         |       |              |           |          |        |       |    |              | Naz, 0-1       | 3400, 4300  | 2.015 | 0.034   | 84    | <b>0.042</b> |
|           |             |       |         |       |              |           |          |        |       |    |              | Naz, 1-2       | 3400, 4300  | 2.488 | 0.203   | 5     | <b>0.044</b> |
|           |             |       |         |       |              |           |          |        |       |    |              | Naz, 2-3       | 3400, 4300  | 0.243 | 1.000   | 5     | 0.923        |
|           |             |       |         |       |              |           |          |        |       |    |              | Naz, 3-4       | 3400, 4300  | 0.909 | 0.402   | 5     | 0.462        |
|           |             |       |         |       |              |           |          |        |       |    |              | Naz, 4-5       | 3400, 4300  | 0.963 | 0.394   | 5     | 0.435        |
|           |             |       |         |       |              |           |          |        |       |    |              | Set, 0-1       | 3400, 4300  | 2.429 | 0.109   | 10    | <b>0.048</b> |
|           |             |       |         |       |              |           |          |        |       |    |              | Set, 1-2       | 3400, 4300  | 2.193 | 0.093   | 10    | 0.067        |
|           |             |       |         |       |              |           |          |        |       |    |              | Set, 2-3       | 3400, 4300  | 0.670 | 0.699   | 10    | 0.671        |
|           |             |       |         |       |              |           |          |        |       |    |              | Set, 3-4       | 3400, 4300  | 2.487 | 0.093   | 10    | <b>0.040</b> |
|           |             |       |         |       |              |           |          |        |       |    |              | Set, 4-5       | 3400, 4300  | 2.864 | 0.109   | 10    | <b>0.032</b> |
|           |             |       |         |       |              |           |          |        |       |    |              | Slope, 0-1     | 3400, 4300  | 0.832 | 0.493   | 10    | 0.521        |
|           |             |       |         |       |              |           |          |        |       |    |              | Within Ar x WD | Comparisons | t     | P(perm) | perms | P(MC)        |
|           |             |       |         |       |              |           |          |        |       |    |              | Cas, 3400      | 0-1, 1-2    | 3.445 | 0.091   | 38    | <b>0.062</b> |
|           |             |       |         |       |              |           |          |        |       |    |              | Cas, 3400      | 0-1, 2-3    | 2.127 | 0.229   | 38    | 0.156        |
|           |             |       |         |       |              |           |          |        |       |    |              | Cas, 3400      | 0-1, 3-4    | 1.550 | 0.296   | 38    | 0.257        |
|           |             |       |         |       |              |           |          |        |       |    |              | Cas, 3400      | 0-1, 4-5    | 1.916 | 0.158   | 38    | 0.140        |
|           |             |       |         |       |              |           |          |        |       |    |              | Cas, 3400      | 1-2, 2-3    | 0.203 | 1.000   | 38    | 0.948        |
|           |             |       |         |       |              |           |          |        |       |    |              | Cas, 3400      | 1-2, 3-4    | 0.667 | 0.603   | 38    | 0.593        |
|           |             |       |         |       |              |           |          |        |       |    |              | Cas, 3400      | 1-2, 4-5    | 3.005 | 0.098   | 38    | 0.056        |
|           |             |       |         |       |              |           |          |        |       |    |              | Cas, 3400      | 2-3, 3-4    | 0.691 | 0.707   | 38    | 0.590        |
|           |             |       |         |       |              |           |          |        |       |    |              | Cas, 3400      | 2-3, 4-5    | 1.160 | 0.337   | 38    | 0.307        |
|           |             |       |         |       |              |           |          |        |       |    |              | Cas, 3400      | 3-4, 4-5    | 0.637 | 0.827   | 38    | 0.662        |

|           |          |       |       |     |              |
|-----------|----------|-------|-------|-----|--------------|
| Cas, 4300 | 0-1, 1-2 | 0.502 | 0.810 | 38  | 0.774        |
| Cas, 4300 | 0-1, 2-3 | 0.806 | 0.574 | 38  | 0.547        |
| Cas, 4300 | 0-1, 3-4 | 1.049 | 0.363 | 38  | 0.407        |
| Cas, 4300 | 0-1, 4-5 | 0.492 | 0.802 | 38  | 0.775        |
| Cas, 4300 | 1-2, 2-3 | 1.732 | 0.200 | 38  | 0.209        |
| Cas, 4300 | 1-2, 3-4 | 0.487 | 0.875 | 38  | 0.674        |
| Cas, 4300 | 1-2, 4-5 | 1.610 | 0.182 | 38  | 0.209        |
| Cas, 4300 | 2-3, 3-4 | 0.507 | 0.636 | 38  | 0.687        |
| Cas, 4300 | 2-3, 4-5 | 1.117 | 0.300 | 38  | 0.368        |
| Cas, 4300 | 3-4, 4-5 | 0.717 | 0.619 | 38  | 0.609        |
| Naz, 3400 | 0-1, 1-2 | 0.645 | 0.673 | 915 | 0.632        |
| Naz, 3400 | 0-1, 2-3 | 0.928 | 0.437 | 891 | 0.433        |
| Naz, 3400 | 0-1, 3-4 | 1.868 | 0.145 | 911 | 0.114        |
| Naz, 3400 | 0-1, 4-5 | 3.052 | 0.035 | 926 | <b>0.035</b> |
| Naz, 3400 | 1-2, 2-3 | 1.093 | 0.432 | 361 | 0.365        |
| Naz, 3400 | 1-2, 3-4 | 2.963 | 0.074 | 366 | 0.057        |
| Naz, 3400 | 1-2, 4-5 | 3.730 | 0.029 | 377 | <b>0.018</b> |
| Naz, 3400 | 2-3, 3-4 | 1.173 | 0.362 | 374 | 0.318        |
| Naz, 3400 | 2-3, 4-5 | 1.450 | 0.231 | 361 | 0.208        |
| Naz, 3400 | 3-4, 4-5 | 0.684 | 0.615 | 370 | 0.587        |
| Set, 3400 | 0-1, 1-2 | 0.631 | 0.620 | 38  | 0.600        |
| Set, 3400 | 0-1, 2-3 | 1.494 | 0.179 | 38  | 0.230        |
| Set, 3400 | 0-1, 3-4 | 3.815 | 0.092 | 38  | <b>0.043</b> |
| Set, 3400 | 0-1, 4-5 | 3.733 | 0.106 | 38  | 0.052        |
| Set, 3400 | 1-2, 2-3 | 0.527 | 0.666 | 38  | 0.669        |
| Set, 3400 | 1-2, 3-4 | 3.232 | 0.096 | 38  | 0.058        |
| Set, 3400 | 1-2, 4-5 | 3.476 | 0.150 | 38  | 0.070        |
| Set, 3400 | 2-3, 3-4 | 2.146 | 0.193 | 38  | 0.144        |
| Set, 3400 | 2-3, 4-5 | 2.294 | 0.154 | 38  | 0.136        |
| Set, 3400 | 3-4, 4-5 | 1.328 | 0.316 | 38  | 0.283        |
| Set, 4300 | 0-1, 1-2 | 1.561 | 0.239 | 38  | 0.225        |
| Set, 4300 | 0-1, 2-3 | 0.646 | 0.609 | 38  | 0.687        |
| Set, 4300 | 0-1, 3-4 | 0.756 | 0.555 | 38  | 0.560        |
| Set, 4300 | 0-1, 4-5 | 0.904 | 0.488 | 38  | 0.516        |
| Set, 4300 | 1-2, 2-3 | 2.080 | 0.192 | 38  | 0.143        |
| Set, 4300 | 1-2, 3-4 | 2.579 | 0.177 | 38  | 0.110        |
| Set, 4300 | 1-2, 4-5 | 1.361 | 0.363 | 38  | 0.262        |
| Set, 4300 | 2-3, 3-4 | 0.739 | 0.597 | 38  | 0.607        |
| Set, 4300 | 2-3, 4-5 | 1.199 | 0.275 | 38  | 0.346        |
| Set, 4300 | 3-4, 4-5 | 1.228 | 0.402 | 38  | 0.352        |

13 **Table B3.** 4-factor PERMANOVA pairwise test results for significant double and three-way interactions based on functional diversity data. Ar:  
14 area; WD: water depth; SD: sediment depth; perms: possible; permutations; P(MC): Monte-Carlo p-values. Bold P(MC) values:  $p < 0.05$ ; bold, italic  
15 values:  $p < 0.01$ . Gol: Gollum channels; Whi: Whittard Cayon; Cas: Cascais Canyon; Set: Setúbal Canyon; Naz: Nazaré Canyon  
16

| Irish Margin        |             |       |         |       |              | Western Iberian Margin |             |       |         |       |              | Western Iberian Margin |             |       |         |       |              |
|---------------------|-------------|-------|---------|-------|--------------|------------------------|-------------|-------|---------|-------|--------------|------------------------|-------------|-------|---------|-------|--------------|
| Double interactions |             |       |         |       |              | Double interactions    |             |       |         |       |              | Three-way interactions |             |       |         |       |              |
| Within Ar           | Comparisons | t     | P(perm) | perms | P(MC)        | Within WD              | Comparisons | t     | P(perm) | perms | P(MC)        | Within WD x SD         | Comparisons | t     | P(perm) | perms | P(MC)        |
| Gol                 | 0-1, 1-2    | 3.357 | 0.014   | 971   | <b>0.018</b> | 3400                   | Cas, Naz    | 1.561 | 0.128   | 678   | 0.126        | 3400, 0-1              | Cas, Naz    | 1.002 | 0.443   | 84    | 0.397        |
| Gol                 | 0-1, 2-3    | 6.571 | 0.004   | 976   | <b>0.004</b> | 3400                   | Cas, Set    | 2.872 | 0.105   | 10    | <b>0.016</b> | 3400, 0-1              | Cas, Set    | 0.520 | 0.788   | 10    | 0.637        |
| Gol                 | 0-1, 3-4    | 8.585 | 0.004   | 997   | <b>0.004</b> | 3400                   | Cas, Slope  | 0.665 | 0.742   | 20    | 0.639        | 3400, 0-1              | Cas, Slope  | 1.080 | 0.505   | 10    | 0.341        |
| Gol                 | 0-1, 4-5    | 3.602 | 0.009   | 973   | <b>0.008</b> | 3400                   | Naz, Set    | 0.959 | 0.399   | 706   | 0.452        | 3400, 0-1              | Naz, Set    | 0.841 | 0.521   | 84    | 0.440        |
| Gol                 | 1-2, 2-3    | 1.210 | 0.288   | 976   | 0.271        | 3400                   | Naz, Slope  | 0.935 | 0.434   | 690   | 0.420        | 3400, 0-1              | Naz, Slope  | 2.433 | 0.018   | 84    | <b>0.029</b> |
| Gol                 | 1-2, 3-4    | 2.472 | 0.060   | 999   | 0.060        | 3400                   | Set, Slope  | 1.560 | 0.206   | 20    | 0.137        | 3400, 0-1              | Set, Slope  | 2.386 | 0.107   | 10    | <b>0.039</b> |
| Gol                 | 1-2, 4-5    | 1.341 | 0.226   | 981   | 0.237        | 4300                   | Cas, Naz    | 2.628 | 0.001   | 20    | <b>0.010</b> | 3400, 1-2              | Cas, Naz    | 1.030 | 0.447   | 35    | 0.326        |
| Gol                 | 2-3, 3-4    | 0.830 | 0.501   | 998   | 0.525        | 4300                   | Cas, Set    | 2.154 | 0.104   | 10    | 0.053        | 3400, 1-2              | Cas, Set    | 2.079 | 0.226   | 10    | 0.106        |
| Gol                 | 2-3, 4-5    | 1.248 | 0.262   | 966   | 0.283        | 4300                   | Cas, Slope  | 2.835 | 0.036   | 20    | <b>0.006</b> | 3400, 1-2              | Cas, Slope  | 0.944 | 0.761   | 4     | 0.466        |
| Gol                 | 3-4, 4-5    | 0.989 | 0.415   | 998   | 0.386        | 4300                   | Naz, Set    | 2.010 | 0.147   | 20    | <b>0.038</b> | 3400, 1-2              | Naz, Set    | 2.414 | 0.029   | 35    | 0.062        |
| Whi                 | 0-1, 1-2    | 1.212 | 0.291   | 980   | 0.292        | 4300                   | Naz, Slope  | 2.286 | 0.113   | 10    | 0.057        | 3400, 1-2              | Naz, Slope  | 0.773 | 0.405   | 5     | 0.537        |
| Whi                 | 0-1, 2-3    | 4.253 | 0.002   | 970   | <b>0.006</b> | 4300                   | Set, Slope  | 1.502 | 0.301   | 20    | 0.128        | 3400, 1-2              | Set, Slope  | 2.247 | 0.243   | 4     | 0.128        |
| Whi                 | 0-1, 3-4    | 3.783 | 0.010   | 973   | <b>0.017</b> | Within Ar              |             |       |         |       |              | 3400, 2-3              | Cas, Naz    | 2.376 | 0.058   | 35    | <b>0.045</b> |
| Whi                 | 0-1, 4-5    | 3.267 | 0.015   | 981   | <b>0.007</b> | Cas                    | 3400, 4300  | 0.865 | 0.508   | 10    | 0.506        | 3400, 2-3              | Cas, Set    | 1.710 | 0.208   | 10    | 0.150        |
| Whi                 | 1-2, 2-3    | 2.629 | 0.028   | 966   | <b>0.025</b> | Cas                    | 0-1, 1-2    | 2.287 | 0.072   | 979   | 0.077        | 3400, 2-3              | Cas, Slope  | 2.567 | 0.245   | 4     | 0.093        |
| Whi                 | 1-2, 3-4    | 1.396 | 0.195   | 977   | 0.223        | Cas                    | 0-1, 2-3    | 1.982 | 0.094   | 976   | 0.091        | 3400, 2-3              | Naz, Set    | 1.051 | 0.352   | 35    | 0.340        |
| Whi                 | 1-2, 4-5    | 2.413 | 0.067   | 988   | 0.076        | Cas                    | 0-1, 3-4    | 2.601 | 0.036   | 984   | 0.047        | 3400, 2-3              | Naz, Slope  | 0.727 | 0.776   | 5     | 0.546        |
| Whi                 | 2-3, 3-4    | 1.274 | 0.253   | 974   | 0.269        | Cas                    | 0-1, 4-5    | 1.844 | 0.093   | 977   | 0.095        | 3400, 2-3              | Set, Slope  | 0.122 | 1.000   | 4     | 0.961        |
| Whi                 | 2-3, 4-5    | 2.202 | 0.042   | 979   | <b>0.048</b> | Cas                    | 1-2, 2-3    | 1.851 | 0.110   | 969   | 0.091        | 3400, 3-4              | Cas, Naz    | 2.129 | 0.023   | 35    | <b>0.049</b> |
| Whi                 | 3-4, 4-5    | 2.114 | 0.046   | 979   | 0.079        | Cas                    | 1-2, 3-4    | 0.850 | 0.534   | 983   | 0.500        | 3400, 3-4              | Cas, Set    | 7.148 | 0.100   | 10    | <b>0.002</b> |
| Within SD           |             |       |         |       |              | Cas                    | 1-2, 4-5    | 1.554 | 0.189   | 978   | 0.173        | 3400, 3-4              | Cas, Slope  | 1.460 | 0.503   | 4     | 0.270        |
| 0-1                 | Gol, Whi    | 3.136 | 0.007   | 985   | <b>0.006</b> | Cas                    | 2-3, 3-4    | 0.909 | 0.450   | 972   | 0.440        | 3400, 3-4              | Naz, Set    | 2.160 | 0.029   | 35    | <b>0.034</b> |
| 1-2                 | Gol, Whi    | 1.936 | 0.078   | 986   | 0.094        | Cas                    | 2-3, 4-5    | 2.630 | 0.044   | 980   | <b>0.041</b> | 3400, 3-4              | Naz, Slope  | 1.058 | 0.399   | 5     | 0.383        |
| 2-3                 | Gol, Whi    | 3.735 | 0.003   | 984   | <b>0.006</b> | Cas                    | 3-4, 4-5    | 3.172 | 0.028   | 980   | <b>0.024</b> | 3400, 3-4              | Set, Slope  | 4.259 | 0.236   | 4     | <b>0.042</b> |
| 3-4                 | Gol, Whi    | 6.938 | 0.001   | 991   | <b>0.001</b> | Naz                    | 3400, 4300  | 0.854 | 0.469   | 675   | 0.485        | 3400, 4-5              | Cas, Naz    | 0.716 | 0.862   | 35    | 0.593        |
| 4-5                 | Gol, Whi    | 0.157 | 0.981   | 986   | 0.978        | Naz                    | 0-1, 1-2    | 1.613 | 0.216   | 998   | 0.214        | 3400, 4-5              | Cas, Set    | 1.478 | 0.304   | 10    | 0.199        |
|                     |             |       |         |       |              | Naz                    | 0-1, 2-3    | 4.077 | 0.027   | 995   | <b>0.036</b> | 3400, 4-5              | Cas, Slope  | 1.455 | 0.259   | 4     | 0.296        |
|                     |             |       |         |       |              | Naz                    | 0-1, 3-4    | 3.472 | 0.027   | 999   | <b>0.023</b> | 3400, 4-5              | Naz, Set    | 1.708 | 0.116   | 35    | 0.116        |
|                     |             |       |         |       |              | Naz                    | 0-1, 4-5    | 5.035 | 0.012   | 998   | <b>0.006</b> | 3400, 4-5              | Naz, Slope  | 1.142 | 0.402   | 5     | 0.333        |
|                     |             |       |         |       |              | Naz                    | 1-2, 2-3    | 1.644 | 0.144   | 983   | 0.144        | 3400, 4-5              | Set, Slope  | 2.762 | 0.253   | 4     | 0.099        |
|                     |             |       |         |       |              | Naz                    | 1-2, 3-4    | 2.314 | 0.051   | 982   | <b>0.048</b> | 4300, 0-1              | Cas, Naz    | 2.044 | 0.213   | 10    | 0.093        |
|                     |             |       |         |       |              | Naz                    | 1-2, 4-5    | 3.693 | 0.022   | 983   | <b>0.027</b> | 4300, 0-1              | Cas, Set    | 1.655 | 0.192   | 10    | 0.142        |
|                     |             |       |         |       |              | Naz                    | 2-3, 3-4    | 1.377 | 0.235   | 985   | 0.225        | 4300, 0-1              | Cas, Slope  | 1.368 | 0.191   | 10    | 0.239        |
|                     |             |       |         |       |              | Naz                    | 2-3, 4-5    | 2.351 | 0.027   | 975   | <b>0.046</b> | 4300, 0-1              | Naz, Set    | 5.224 | 0.104   | 10    | <b>0.004</b> |
|                     |             |       |         |       |              | Naz                    | 3-4, 4-5    | 0.853 | 0.520   | 969   | 0.493        | 4300, 0-1              | Naz, Slope  | 5.439 | 0.087   | 10    | <b>0.004</b> |
|                     |             |       |         |       |              | Set                    | 3400, 4300  | 3.719 | 0.113   | 10    | <b>0.006</b> | 4300, 0-1              | Set, Slope  | 0.673 | 0.606   | 10    | 0.588        |
|                     |             |       |         |       |              | Set                    | 0-1, 1-2    | 1.323 | 0.249   | 975   | 0.248        | 4300, 1-2              | Cas, Naz    | 1.552 | 0.477   | 4     | 0.233        |
|                     |             |       |         |       |              | Set                    | 0-1, 2-3    | 1.051 | 0.378   | 976   | 0.368        | 4300, 1-2              | Cas, Set    | 1.991 | 0.186   | 10    | 0.088        |

|           |             |       |         |       |              |                |             |        |         |       |              |
|-----------|-------------|-------|---------|-------|--------------|----------------|-------------|--------|---------|-------|--------------|
| Set       | 0-1, 3-4    | 5.598 | 0.006   | 982   | <b>0.001</b> | 4300, 1-2      | Cas, Slope  | 0.463  | 1.000   | 4     | 0.786        |
| Set       | 0-1, 4-5    | 2.975 | 0.036   | 978   | <b>0.035</b> | 4300, 1-2      | Naz, Set    | 2.662  | 0.242   | 4     | 0.097        |
| Set       | 1-2, 2-3    | 0.324 | 0.847   | 972   | 0.849        | 4300, 1-2      | Set, Slope  | 1.410  | 0.498   | 4     | 0.328        |
| Set       | 1-2, 3-4    | 3.448 | 0.011   | 974   | <b>0.014</b> | 4300, 2-3      | Cas, Naz    | 1.292  | 0.510   | 4     | 0.301        |
| Set       | 1-2, 4-5    | 4.927 | 0.004   | 969   | <b>0.004</b> | 4300, 2-3      | Cas, Set    | 0.877  | 0.587   | 10    | 0.479        |
| Set       | 2-3, 3-4    | 3.490 | 0.021   | 973   | <b>0.017</b> | 4300, 2-3      | Cas, Slope  | 1.407  | 0.507   | 4     | 0.260        |
| Set       | 2-3, 4-5    | 2.803 | 0.048   | 966   | <b>0.046</b> | 4300, 2-3      | Naz, Set    | 1.369  | 0.482   | 4     | 0.282        |
| Set       | 3-4, 4-5    | 0.637 | 0.674   | 975   | 0.637        | 4300, 2-3      | Set, Slope  | 0.901  | 0.494   | 4     | 0.470        |
| Slope     | 3400, 4300  | 2.729 | 0.001   | 10    | <b>0.043</b> | 4300, 3-4      | Cas, Naz    | 3.095  | 0.257   | 4     | <b>0.039</b> |
| Within SD | Comparisons | t     | P(perm) | perms | P(MC)        | 4300, 3-4      | Cas, Set    | 0.839  | 0.491   | 10    | 0.481        |
| 0-1       | Cas, Naz    | 2.074 | 0.040   | 997   | <b>0.033</b> | 4300, 3-4      | Cas, Slope  | 2.897  | 0.247   | 4     | 0.073        |
| 0-1       | Cas, Set    | 1.641 | 0.122   | 985   | 0.119        | 4300, 3-4      | Naz, Set    | 2.686  | 0.268   | 4     | 0.079        |
| 0-1       | Cas, Slope  | 1.465 | 0.188   | 976   | 0.158        | 4300, 3-4      | Set, Slope  | 2.411  | 0.255   | 4     | 0.113        |
| 0-1       | Naz, Set    | 4.272 | 0.001   | 998   | <b>0.001</b> | 4300, 4-5      | Cas, Naz    | 13.026 | 0.250   | 4     | <b>0.002</b> |
| 0-1       | Naz, Slope  | 4.801 | 0.001   | 998   | <b>0.001</b> | 4300, 4-5      | Cas, Set    | 1.334  | 0.408   | 10    | 0.246        |
| 0-1       | Set, Slope  | 1.659 | 0.098   | 982   | 0.102        | 4300, 4-5      | Cas, Slope  | 5.521  | 0.219   | 4     | <b>0.020</b> |
| 1-2       | Cas, Naz    | 1.301 | 0.218   | 979   | 0.226        | 4300, 4-5      | Naz, Set    | 1.956  | 0.247   | 4     | 0.155        |
| 1-2       | Cas, Set    | 1.160 | 0.278   | 989   | 0.287        | 4300, 4-5      | Set, Slope  | 0.431  | 1.000   | 4     | 0.803        |
| 1-2       | Cas, Slope  | 0.579 | 0.647   | 172   | 0.722        | Within Ar x SD | Comparisons | t      | P(perm) | perms | P(MC)        |
| 1-2       | Naz, Set    | 2.043 | 0.031   | 981   | <b>0.047</b> | Cas, 0-1       | 3400, 4300  | 0.767  | 0.508   | 10    | 0.527        |
| 1-2       | Naz, Slope  | 0.962 | 0.464   | 70    | 0.424        | Cas, 1-2       | 3400, 4300  | 0.275  | 0.810   | 10    | 0.941        |
| 1-2       | Set, Slope  | 0.770 | 0.586   | 170   | 0.541        | Cas, 2-3       | 3400, 4300  | 0.549  | 0.784   | 10    | 0.737        |
| 2-3       | Cas, Naz    | 2.348 | 0.026   | 980   | <b>0.040</b> | Cas, 3-4       | 3400, 4300  | 0.189  | 1.000   | 10    | 0.952        |
| 2-3       | Cas, Set    | 1.259 | 0.214   | 980   | 0.254        | Cas, 4-5       | 3400, 4300  | 3.340  | 0.096   | 10    | <b>0.021</b> |
| 2-3       | Cas, Slope  | 1.975 | 0.137   | 173   | 0.103        | Naz, 0-1       | 3400, 4300  | 3.202  | 0.012   | 84    | <b>0.008</b> |
| 2-3       | Naz, Set    | 1.621 | 0.110   | 973   | 0.139        | Naz, 1-2       | 3400, 4300  | 1.330  | 0.403   | 5     | 0.254        |
| 2-3       | Naz, Slope  | 0.892 | 0.462   | 70    | 0.458        | Naz, 2-3       | 3400, 4300  | 0.241  | 1.000   | 5     | 0.896        |
| 2-3       | Set, Slope  | 0.627 | 0.617   | 174   | 0.619        | Naz, 3-4       | 3400, 4300  | 1.127  | 0.406   | 5     | 0.350        |
| 3-4       | Cas, Naz    | 3.042 | 0.001   | 981   | <b>0.001</b> | Naz, 4-5       | 3400, 4300  | 2.006  | 0.184   | 5     | 0.085        |
| 3-4       | Cas, Set    | 4.383 | 0.001   | 986   | <b>0.001</b> | Set, 0-1       | 3400, 4300  | 2.509  | 0.120   | 10    | <b>0.037</b> |
| 3-4       | Cas, Slope  | 3.163 | 0.048   | 173   | <b>0.018</b> | Set, 1-2       | 3400, 4300  | 3.500  | 0.108   | 10    | <b>0.018</b> |
| 3-4       | Naz, Set    | 0.606 | 0.687   | 981   | 0.671        | Set, 2-3       | 3400, 4300  | 1.016  | 0.401   | 10    | 0.397        |
| 3-4       | Naz, Slope  | 0.859 | 0.520   | 70    | 0.489        | Set, 3-4       | 3400, 4300  | 5.809  | 0.114   | 10    | <b>0.007</b> |
| 3-4       | Set, Slope  | 1.277 | 0.240   | 175   | 0.256        | Set, 4-5       | 3400, 4300  | 2.149  | 0.099   | 10    | 0.081        |
| 4-5       | Cas, Naz    | 2.992 | 0.007   | 976   | <b>0.010</b> | Slope, 0-1     | 3400, 4300  | 1.787  | 0.221   | 10    | <b>0.100</b> |
| 4-5       | Cas, Set    | 1.893 | 0.074   | 987   | 0.061        | Within Ar x WD | Comparisons | t      | P(perm) | perms | P(MC)        |
| 4-5       | Cas, Slope  | 0.401 | 0.707   | 173   | 0.775        | Cas, 3400      | 0-1, 1-2    | 1.542  | 0.274   | 38    | 0.235        |
| 4-5       | Naz, Set    | 1.104 | 0.359   | 979   | 0.347        | Cas, 3400      | 0-1, 2-3    | 1.343  | 0.392   | 38    | 0.321        |
| 4-5       | Naz, Slope  | 1.859 | 0.084   | 70    | 0.119        | Cas, 3400      | 0-1, 3-4    | 1.408  | 0.323   | 38    | 0.287        |
| 4-5       | Set, Slope  | 1.132 | 0.393   | 174   | 0.290        | Cas, 3400      | 0-1, 4-5    | 2.544  | 0.119   | 38    | 0.061        |
|           |             |       |         |       |              | Cas, 3400      | 1-2, 2-3    | 1.636  | 0.243   | 38    | 0.239        |
|           |             |       |         |       |              | Cas, 3400      | 1-2, 3-4    | 0.514  | 0.888   | 38    | 0.743        |
|           |             |       |         |       |              | Cas, 3400      | 1-2, 4-5    | 2.458  | 0.177   | 38    | 0.123        |
|           |             |       |         |       |              | Cas, 3400      | 2-3, 3-4    | 1.324  | 0.321   | 38    | 0.308        |
|           |             |       |         |       |              | Cas, 3400      | 2-3, 4-5    | 3.742  | 0.110   | 38    | 0.056        |
|           |             |       |         |       |              | Cas, 3400      | 3-4, 4-5    | 5.358  | 0.104   | 38    | <b>0.028</b> |
|           |             |       |         |       |              | Cas, 4300      | 0-1, 1-2    | 2.014  | 0.111   | 38    | 0.133        |



|           |          |        |       |     |              |
|-----------|----------|--------|-------|-----|--------------|
| Cas, 4300 | 0-1, 2-3 | 1.507  | 0.240 | 38  | 0.212        |
| Cas, 4300 | 0-1, 3-4 | 3.149  | 0.104 | 38  | 0.068        |
| Cas, 4300 | 0-1, 4-5 | 1.700  | 0.166 | 38  | 0.168        |
| Cas, 4300 | 1-2, 2-3 | 0.967  | 0.469 | 38  | 0.475        |
| Cas, 4300 | 1-2, 3-4 | 0.733  | 0.585 | 38  | 0.589        |
| Cas, 4300 | 1-2, 4-5 | 1.352  | 0.300 | 38  | 0.278        |
| Cas, 4300 | 2-3, 3-4 | 0.373  | 0.791 | 38  | 0.785        |
| Cas, 4300 | 2-3, 4-5 | 0.692  | 0.702 | 38  | 0.552        |
| Cas, 4300 | 3-4, 4-5 | 1.352  | 0.275 | 38  | 0.262        |
| Naz, 3400 | 0-1, 1-2 | 2.378  | 0.093 | 892 | 0.089        |
| Naz, 3400 | 0-1, 2-3 | 3.967  | 0.039 | 907 | <b>0.029</b> |
| Naz, 3400 | 0-1, 3-4 | 2.800  | 0.034 | 923 | <b>0.034</b> |
| Naz, 3400 | 0-1, 4-5 | 3.238  | 0.030 | 925 | <b>0.022</b> |
| Naz, 3400 | 1-2, 2-3 | 0.513  | 0.764 | 364 | 0.754        |
| Naz, 3400 | 1-2, 3-4 | 1.136  | 0.331 | 371 | 0.318        |
| Naz, 3400 | 1-2, 4-5 | 1.277  | 0.275 | 371 | 0.299        |
| Naz, 3400 | 2-3, 3-4 | 1.113  | 0.381 | 365 | 0.340        |
| Naz, 3400 | 2-3, 4-5 | 0.996  | 0.507 | 375 | 0.440        |
| Naz, 3400 | 3-4, 4-5 | 0.141  | 0.888 | 374 | 0.965        |
| Set, 3400 | 0-1, 1-2 | 2.011  | 0.123 | 38  | 0.119        |
| Set, 3400 | 0-1, 2-3 | 2.109  | 0.241 | 38  | 0.154        |
| Set, 3400 | 0-1, 3-4 | 10.512 | 0.096 | 38  | <b>0.008</b> |
| Set, 3400 | 0-1, 4-5 | 5.950  | 0.095 | 38  | <b>0.032</b> |
| Set, 3400 | 1-2, 2-3 | 1.676  | 0.288 | 37  | 0.222        |
| Set, 3400 | 1-2, 3-4 | 13.925 | 0.110 | 38  | <b>0.007</b> |
| Set, 3400 | 1-2, 4-5 | 9.978  | 0.082 | 38  | <b>0.012</b> |
| Set, 3400 | 2-3, 3-4 | 4.592  | 0.100 | 38  | <b>0.028</b> |
| Set, 3400 | 2-3, 4-5 | 3.094  | 0.108 | 38  | 0.082        |
| Set, 3400 | 3-4, 4-5 | 0.105  | 0.965 | 38  | 0.945        |
| Set, 4300 | 0-1, 1-2 | 1.169  | 0.356 | 38  | 0.358        |
| Set, 4300 | 0-1, 2-3 | 1.014  | 0.410 | 38  | 0.443        |
| Set, 4300 | 0-1, 3-4 | 0.650  | 0.592 | 38  | 0.621        |
| Set, 4300 | 0-1, 4-5 | 0.462  | 1.000 | 38  | 0.787        |
| Set, 4300 | 1-2, 2-3 | 2.221  | 0.219 | 38  | 0.146        |
| Set, 4300 | 1-2, 3-4 | 0.956  | 0.386 | 38  | 0.418        |
| Set, 4300 | 1-2, 4-5 | 1.039  | 0.494 | 38  | 0.424        |
| Set, 4300 | 2-3, 3-4 | 0.487  | 0.932 | 38  | 0.703        |
| Set, 4300 | 2-3, 4-5 | 1.004  | 0.353 | 38  | 0.426        |
| Set, 4300 | 3-4, 4-5 | 0.631  | 0.765 | 38  | 0.687        |

19 **Table B4.** 4-factor PERMANOVA pairwise test results for significant double and three-way interactions based on standing stock data. Ar: area;  
20 WD: water depth; SD: sediment depth; perms: possible; permutations; P(MC): Monte-Carlo p-values. Bold P(MC) values:  $p < 0.05$ ; bold, italic  
21 values:  $p < 0.01$ . Gol: Gollum channels; Whi: Whittard Cayon; Cas: Cascais Canyon; Set: Setúbal Canyon; Naz: Nazaré Canyon.  
22

| Irish Margin        |             |       |         |       |              | Irish Margin           |             |       |         |       |              |
|---------------------|-------------|-------|---------|-------|--------------|------------------------|-------------|-------|---------|-------|--------------|
| Double interactions |             |       |         |       |              | Three-way interactions |             |       |         |       |              |
| Within WD           | Comparisons | t     | P(perm) | perms | P(MC)        | Within WD x SD         | Comparisons | t     | P(perm) | perms | P(MC)        |
| 1000                | 0-1, 1-2    | 7.287 | 0.083   | 488   | <b>0.021</b> | 1000, 0-1              | Gol, Whi    | 1.385 | 0.315   | 3     | 0.276        |
| 1000                | 0-1, 2-3    | 8.924 | 0.084   | 504   | <b>0.006</b> | 1000, 1-2              | Gol, Whi    | 3.783 | 0.338   | 3     | 0.052        |
| 1000                | 0-1, 3-4    | 7.544 | 0.080   | 491   | <b>0.013</b> | 1000, 2-3              | Gol, Whi    | 2.297 | 0.320   | 3     | 0.088        |
| 1000                | 0-1, 4-5    | 4.365 | 0.067   | 162   | 0.129        | 1000, 3-4              | Gol, Whi    | 2.356 | 0.352   | 3     | 0.094        |
| 1000                | 1-2, 2-3    | 6.327 | 0.063   | 487   | <b>0.022</b> | 1000, 4-5              | Gol, Whi    | 0.429 | 1.000   | 3     | 0.793        |
| 1000                | 1-2, 3-4    | 5.905 | 0.061   | 501   | <b>0.018</b> | 700, 0-1               | Gol, Whi    | 3.661 | 0.351   | 3     | 0.046        |
| 1000                | 1-2, 4-5    | 3.647 | 0.108   | 160   | 0.129        | 700, 1-2               | Gol, Whi    | 1.162 | 0.686   | 3     | 0.372        |
| 1000                | 2-3, 3-4    | 2.054 | 0.156   | 494   | 0.174        | 700, 2-3               | Gol, Whi    | 0.373 | 1.000   | 3     | 0.822        |
| 1000                | 2-3, 4-5    | 2.145 | 0.219   | 158   | 0.293        | 700, 3-4               | Gol, Whi    | 1.601 | 0.319   | 3     | 0.246        |
| 1000                | 3-4, 4-5    | 4.603 | 0.101   | 160   | 0.131        | 700, 4-5               | Gol, Whi    | 2.268 | 0.331   | 3     | 0.144        |
| Within Ar           | Comparisons | t     | P(perm) | perms | P(MC)        | Within Ar x SD         | Comparisons | t     | P(perm) | perms | P(MC)        |
| 700                 | 0-1, 1-2    | 1.102 | 0.385   | 504   | 0.371        | Gol, 0-1               | 1000, 700   | 0.369 | 1.000   | 3     | 0.777        |
| 700                 | 0-1, 2-3    | 3.332 | 0.075   | 504   | 0.073        | Gol, 1-2               | 1000, 700   | 1.740 | 0.344   | 3     | 0.216        |
| 700                 | 0-1, 3-4    | 6.913 | 0.078   | 474   | <b>0.014</b> | Gol, 2-3               | 1000, 700   | 0.352 | 1.000   | 3     | 0.852        |
| 700                 | 0-1, 4-5    | 8.068 | 0.071   | 496   | <b>0.011</b> | Gol, 3-4               | 1000, 700   | 6.143 | 0.309   | 3     | <b>0.013</b> |
| 700                 | 1-2, 2-3    | 3.949 | 0.063   | 508   | <b>0.037</b> | Gol, 4-5               | 1000, 700   | 0.840 | 1.000   | 3     | 0.486        |
| 700                 | 1-2, 3-4    | 5.121 | 0.076   | 478   | <b>0.030</b> | Whi, 0-1               | 1000, 700   | 7.034 | 0.331   | 3     | <b>0.018</b> |
| 700                 | 1-2, 4-5    | 5.203 | 0.083   | 490   | <b>0.026</b> | Whi, 1-2               | 1000, 700   | 1.344 | 0.358   | 3     | 0.280        |
| 700                 | 2-3, 3-4    | 4.406 | 0.078   | 480   | <b>0.032</b> | Whi, 2-3               | 1000, 700   | 1.148 | 0.652   | 3     | 0.352        |
| 700                 | 2-3, 4-5    | 4.143 | 0.072   | 486   | <b>0.038</b> | Whi, 3-4               | 1000, 700   | 0.871 | 1.000   | 3     | 0.530        |
| 700                 | 3-4, 4-5    | 1.610 | 0.206   | 486   | 0.226        | Whi, 4-5               | 1000, 700   | 1.098 | 0.672   | 3     | 0.481        |
| Within Ar           | Comparisons | t     | P(perm) | perms | P(MC)        | Within Ar x WD         | Comparisons | t     | P(perm) | perms | P(MC)        |
| Gol                 | 0-1, 1-2    | 5.264 | 0.088   | 481   | <b>0.014</b> | Gol, 1000              | 0-1, 1-2    | 7.972 | 0.273   | 3     | 0.054        |
| Gol                 | 0-1, 2-3    | 6.982 | 0.073   | 508   | <b>0.006</b> | Gol, 1000              | 0-1, 2-3    | 4.285 | 0.239   | 3     | 0.093        |
| Gol                 | 0-1, 3-4    | 6.625 | 0.080   | 474   | <b>0.009</b> | Gol, 1000              | 0-1, 3-4    | 3.667 | 0.285   | 3     | 0.131        |
| Gol                 | 0-1, 4-5    | 6.652 | 0.079   | 483   | <b>0.024</b> | Gol, 1000              | 0-1, 4-5    | 3.759 | 0.238   | 3     | 0.133        |
| Gol                 | 1-2, 2-3    | 5.658 | 0.078   | 502   | <b>0.019</b> | Gol, 1000              | 1-2, 2-3    | 4.953 | 0.279   | 3     | 0.093        |
| Gol                 | 1-2, 3-4    | 6.183 | 0.076   | 497   | <b>0.020</b> | Gol, 1000              | 1-2, 3-4    | 4.528 | 0.238   | 3     | 0.118        |
| Gol                 | 1-2, 4-5    | 6.311 | 0.096   | 496   | <b>0.020</b> | Gol, 1000              | 1-2, 4-5    | 4.649 | 0.261   | 3     | 0.117        |
| Gol                 | 2-3, 3-4    | 4.464 | 0.083   | 504   | <b>0.035</b> | Gol, 1000              | 2-3, 3-4    | 1.605 | 0.246   | 3     | 0.340        |
| Gol                 | 2-3, 4-5    | 4.973 | 0.061   | 500   | <b>0.025</b> | Gol, 1000              | 2-3, 4-5    | 2.340 | 0.258   | 3     | 0.218        |
| Gol                 | 3-4, 4-5    | 5.991 | 0.070   | 493   | <b>0.019</b> | Gol, 1000              | 3-4, 4-5    | 5.835 | 0.221   | 3     | 0.120        |
| Whi                 | 0-1, 1-2    | 2.075 | 0.170   | 486   | 0.166        | Gol, 700               | 0-1, 1-2    | 2.130 | 0.269   | 3     | 0.248        |
| Whi                 | 0-1, 2-3    | 4.626 | 0.077   | 469   | <b>0.036</b> | Gol, 700               | 0-1, 2-3    | 6.831 | 0.226   | 3     | 0.075        |
| Whi                 | 0-1, 3-4    | 9.919 | 0.079   | 476   | <b>0.008</b> | Gol, 700               | 0-1, 3-4    | 7.482 | 0.261   | 3     | 0.068        |
| Whi                 | 0-1, 4-5    | 7.551 | 0.048   | 162   | 0.073        | Gol, 700               | 0-1, 4-5    | 7.906 | 0.250   | 3     | 0.055        |
| Whi                 | 1-2, 2-3    | 5.975 | 0.067   | 485   | <b>0.009</b> | Gol, 700               | 1-2, 2-3    | 2.990 | 0.247   | 3     | 0.177        |
| Whi                 | 1-2, 3-4    | 5.241 | 0.069   | 505   | <b>0.025</b> | Gol, 700               | 1-2, 3-4    | 4.337 | 0.268   | 3     | 0.160        |
| Whi                 | 1-2, 4-5    | 3.386 | 0.108   | 158   | 0.137        | Gol, 700               | 1-2, 4-5    | 4.461 | 0.279   | 3     | 0.136        |
| Whi                 | 2-3, 3-4    | 2.163 | 0.152   | 493   | 0.156        |                        |             |       |         |       |              |

|           |             |       |         |       |              |           |          |        |       |   |              |
|-----------|-------------|-------|---------|-------|--------------|-----------|----------|--------|-------|---|--------------|
| Whi       | 2-3, 4-5    | 1.757 | 0.238   | 161   | 0.311        | Gol, 700  | 2-3, 3-4 | 7.013  | 0.263 | 3 | 0.065        |
| Whi       | 3-4, 4-5    | 1.661 | 0.337   | 164   | 0.310        | Gol, 700  | 2-3, 4-5 | 8.983  | 0.255 | 3 | 0.056        |
| Within SD | Comparisons | t     | P(perm) | perms | P(MC)        | Gol, 700  | 3-4, 4-5 | 1.594  | 0.253 | 3 | 0.296        |
| 0-1       | Gol, Whi    | 2.474 | 0.138   | 260   | 0.068        | Whi, 1000 | 0-1, 1-2 | 7.127  | 0.235 | 3 | 0.060        |
| 1-2       | Gol, Whi    | 3.286 | 0.042   | 259   | <b>0.023</b> | Whi, 1000 | 0-1, 2-3 | 19.180 | 0.232 | 3 | <b>0.018</b> |
| 2-3       | Gol, Whi    | 1.482 | 0.201   | 258   | 0.178        | Whi, 1000 | 0-1, 3-4 | 66.430 | 0.251 | 3 | <b>0.008</b> |
| 3-4       | Gol, Whi    | 0.686 | 0.704   | 252   | 0.605        | Whi, 1000 | 1-2, 2-3 | 5.961  | 0.260 | 3 | 0.087        |
| 4-5       | Gol, Whi    | 1.010 | 0.352   | 301   | 0.393        | Whi, 1000 | 1-2, 3-4 | 7.227  | 0.269 | 3 | 0.058        |
| 0-1       | 1000, 700   | 2.527 | 0.032   | 265   | <b>0.025</b> | Whi, 1000 | 2-3, 3-4 | 1.902  | 0.240 | 3 | 0.238        |
| 1-2       | 1000, 700   | 1.162 | 0.292   | 264   | 0.293        | Whi, 700  | 0-1, 1-2 | 0.740  | 0.517 | 3 | 0.631        |
| 2-3       | 1000, 700   | 1.176 | 0.275   | 260   | 0.287        | Whi, 700  | 0-1, 2-3 | 0.771  | 0.537 | 3 | 0.574        |
| 3-4       | 1000, 700   | 1.021 | 0.390   | 260   | 0.380        | Whi, 700  | 0-1, 3-4 | 2.450  | 0.210 | 3 | 0.243        |
| 4-5       | 1000, 700   | 0.533 | 0.610   | 303   | 0.620        | Whi, 700  | 0-1, 4-5 | 3.276  | 0.250 | 3 | 0.188        |
|           |             |       |         |       |              | Whi, 700  | 1-2, 2-3 | 3.077  | 0.242 | 3 | 0.136        |
|           |             |       |         |       |              | Whi, 700  | 1-2, 3-4 | 2.787  | 0.228 | 3 | 0.158        |
|           |             |       |         |       |              | Whi, 700  | 1-2, 4-5 | 2.808  | 0.265 | 3 | 0.156        |
|           |             |       |         |       |              | Whi, 700  | 2-3, 3-4 | 1.736  | 0.261 | 3 | 0.314        |
|           |             |       |         |       |              | Whi, 700  | 2-3, 4-5 | 1.693  | 0.276 | 3 | 0.343        |
|           |             |       |         |       |              | Whi, 700  | 3-4, 4-5 | 1.214  | 0.261 | 3 | 0.431        |

23

24

25

26
