# Supplementary material for: The importance of different spatial scales in determining structural and functional characteristics of deep-sea infauna communities
Source: Copernicus journal article supplement (doi:10.5194/bg-10-4547-2013), 2013-07-05
Supplement: Supplementary file 2 [file bg-10-4547-2013-supplement.zip]

Archive with 2 entries (2 files):
- Supplementary material for Biogeosciences_Appendix B_tables.pdf
- Supplementary material for Biogeosciences_Appendix A_Fig.pdf
