# Supplementary material for: The importance of different spatial scales in determining structural and functional characteristics of deep-sea infauna communities
Source: Copernicus journal article supplement (doi:10.5194/bg-10-4547-2013), 2013-07-05

## Supplement, Appendix A

**Fig. A1.** Non-metric 2<sup>nd</sup>-stage MDS using the different nematode community descriptors. Green lines represent the statistically significant clusters created by the SIMPROF analysis with an Euclidean Distance value of 10. This diagram illustrates how similar the different descriptors are in characterising the community; descriptors which are closely grouped give relatively similar community information; descriptors that lie far apart give different community information. H0, H1, H2, Hinf: Hill's diversity indices (Hill, 1973); TD: trophic diversity; EG(51): expected number of genera based on 51 individuals.

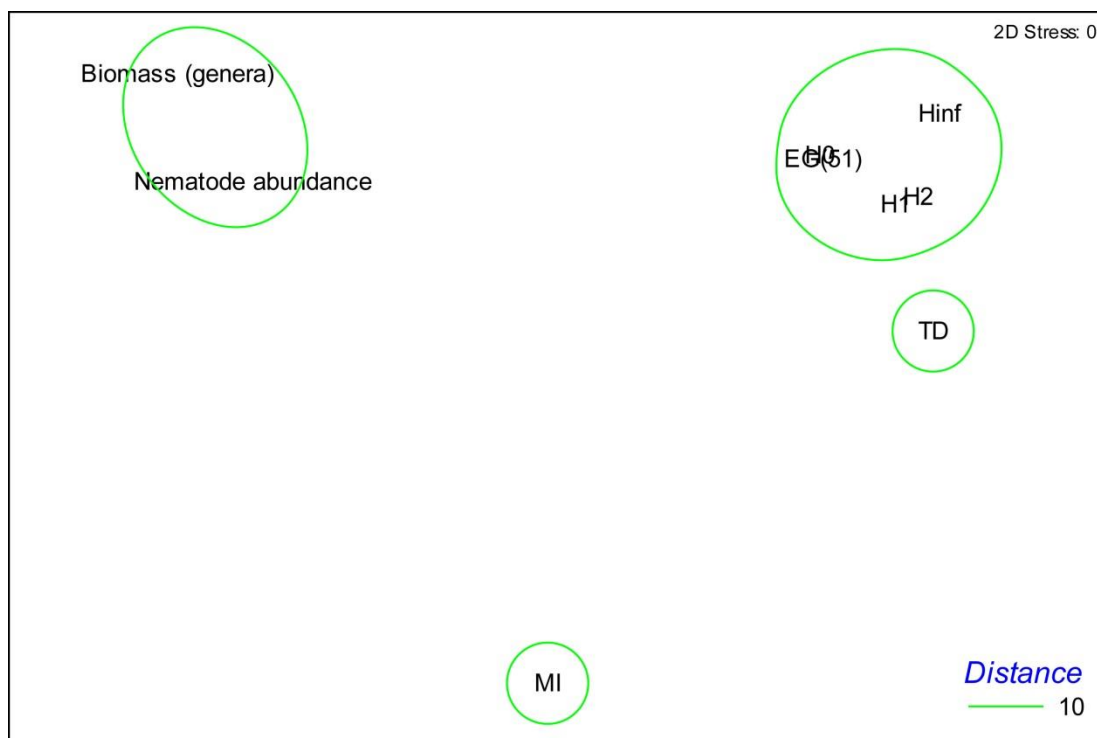

Supplement: Supplementary file 2 [file bg-10-4547-2013-supplement.zip › Supplementary material for Biogeosciences_Appendix A_Fig.pdf]
